# Supplementary material for: DNA polymerase zeta contributes to heterochromatin replication to prevent genome instability
Source: PubMed Central journal article supplement — EMBO J. 2021 Sep 17;40(21):e104543. doi: 10.15252/embj.2020104543 (PMC8561639; doi:10.15252/embj.2020104543), 2021-09-17

Fig 4A

1/4

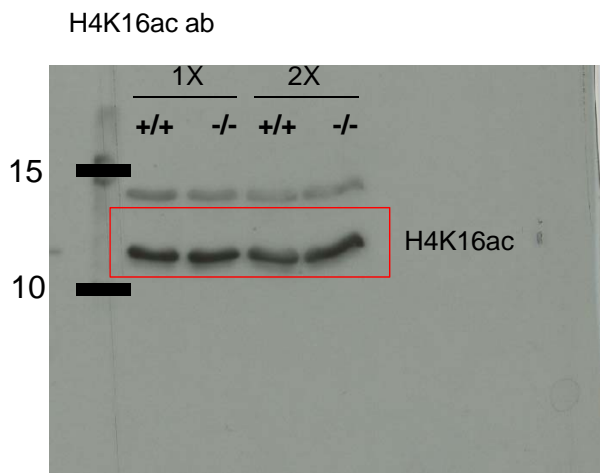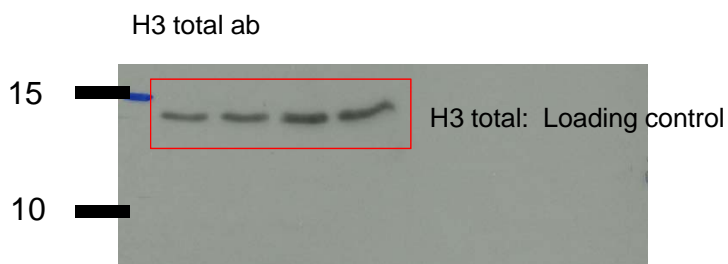

H3K4me3 ab

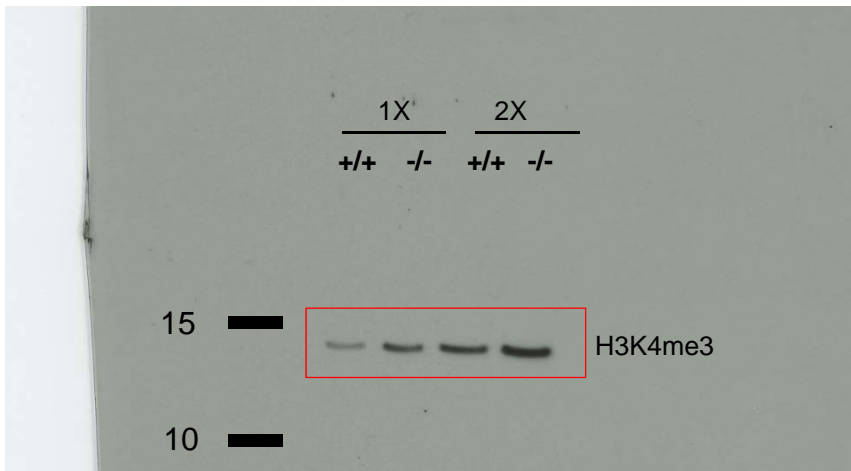

H4 total ab

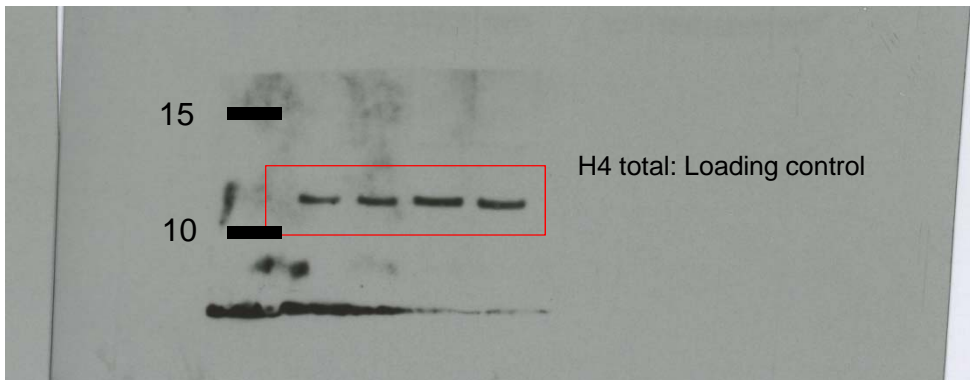

**Fig 4A**

**2/4**

H4K5ac ab

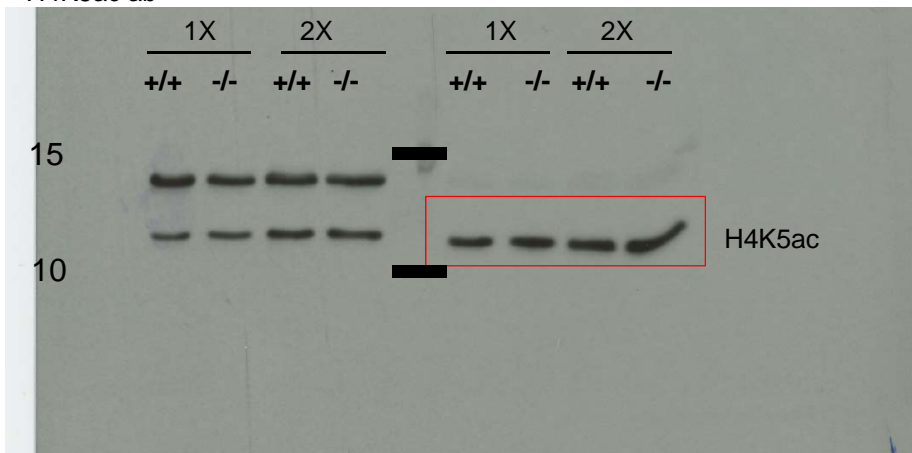

H4 total ab

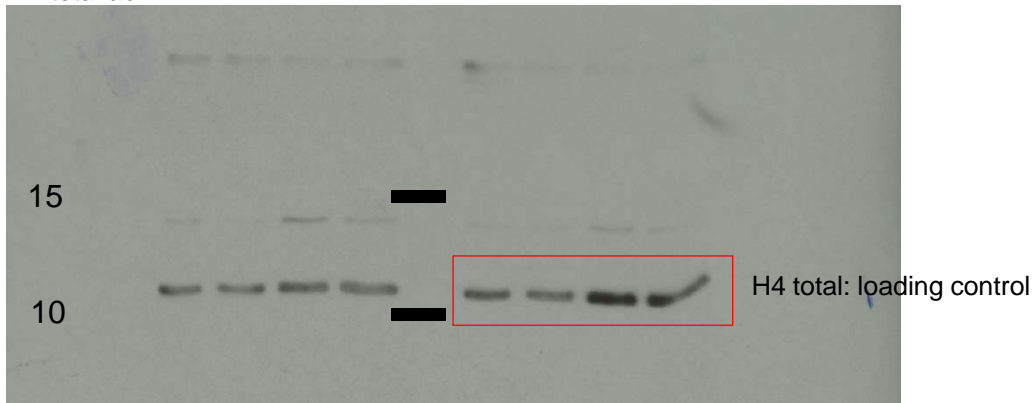

H3K9k14ac ab

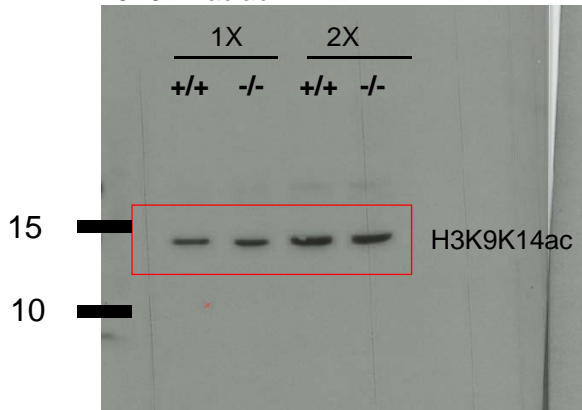

H3 total ab

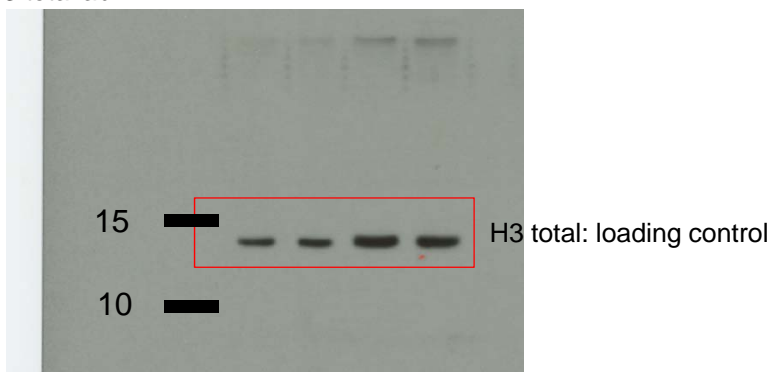

Fig 4A

3/4

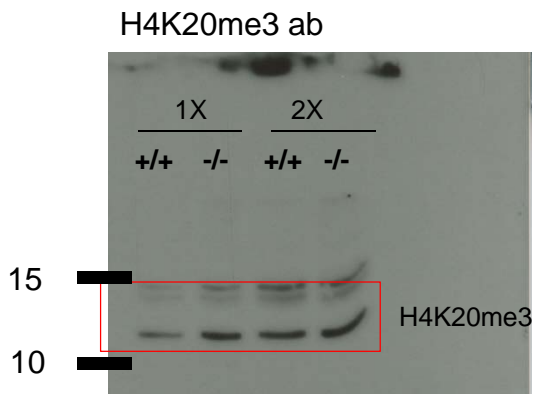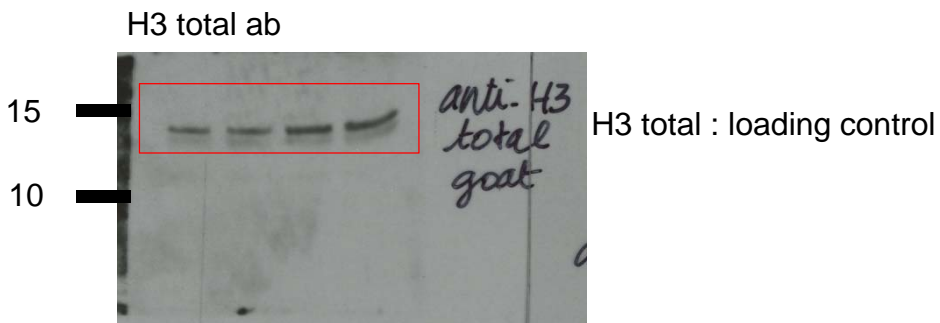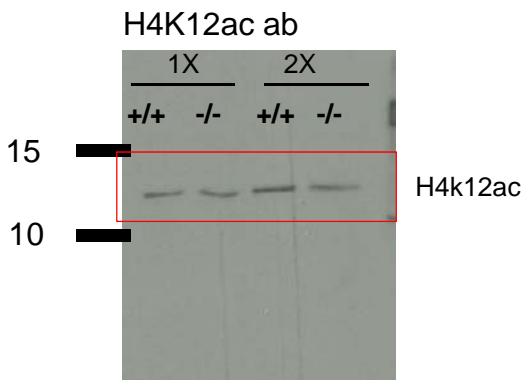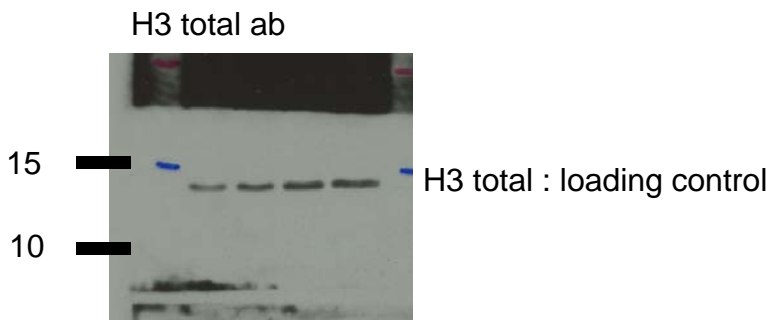

Fig 4A

4/4

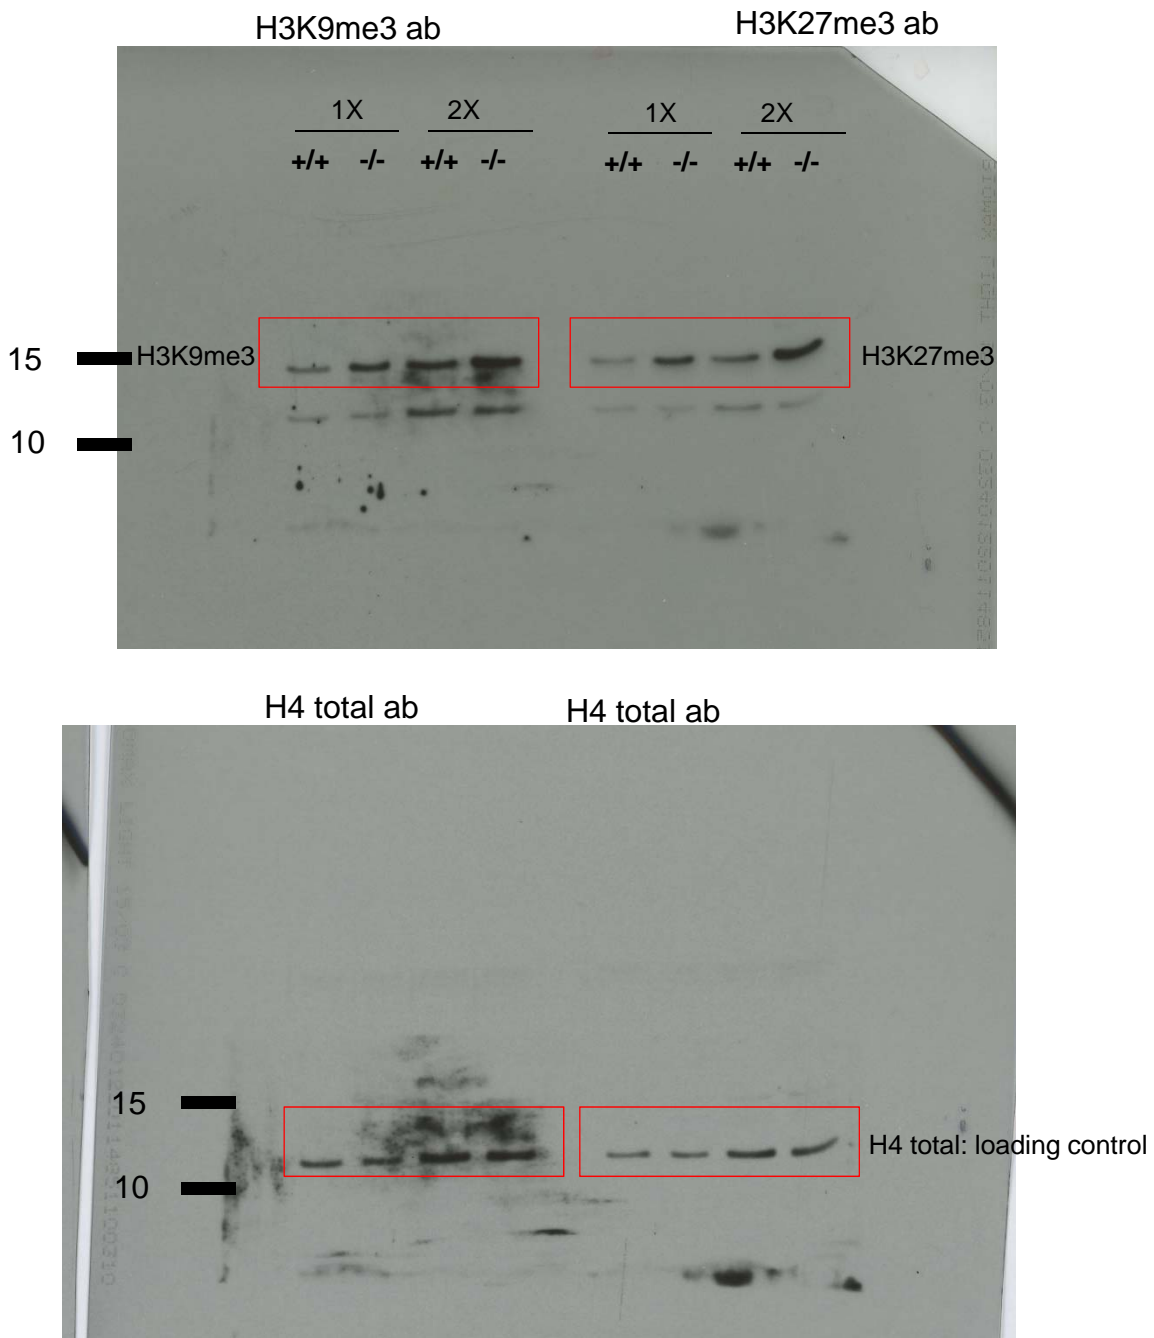

**Fig 4E**

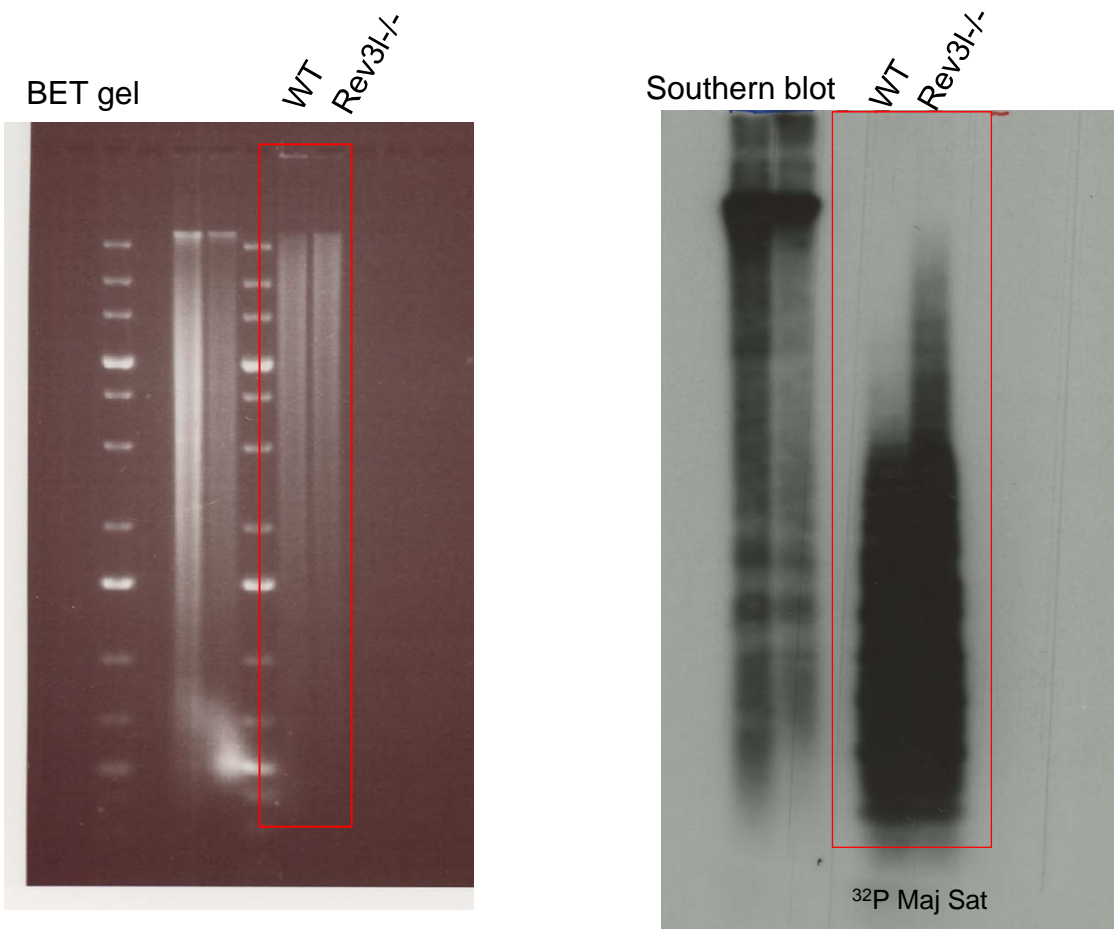

# Fig 4E

2 independent experiments are shown

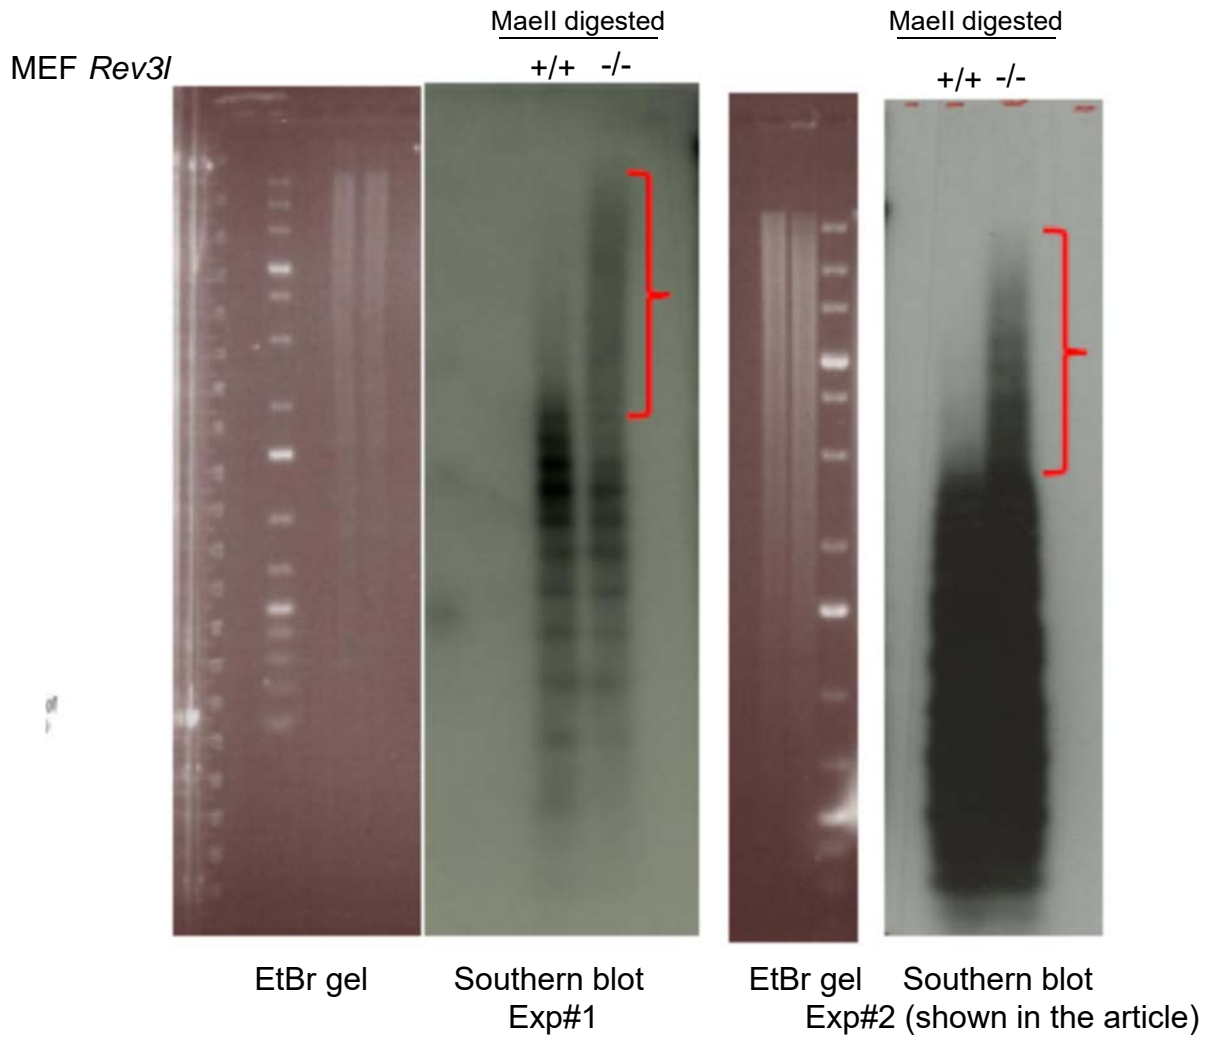

Supplement: EMBJ-40-e104543-s003.pdf [file EMBJ-40-e104543-s003.pdf]
