# Supplementary material for: DNA polymerase zeta contributes to heterochromatin replication to prevent genome instability
Source: PubMed Central journal article supplement — EMBO J. 2021 Sep 17;40(21):e104543. doi: 10.15252/embj.2020104543 (PMC8561639; doi:10.15252/embj.2020104543), 2021-09-17
Supplement: EMBJ-40-e104543-s008.pdf [file EMBJ-40-e104543-s008.pdf]

APPENDIX

For

**DNA polymerase zeta contributes to heterochromatin replication to prevent genome instability**

By Barbara Ben Yamin et al

CONTENTS:

- Appendix Figure S1 with legend

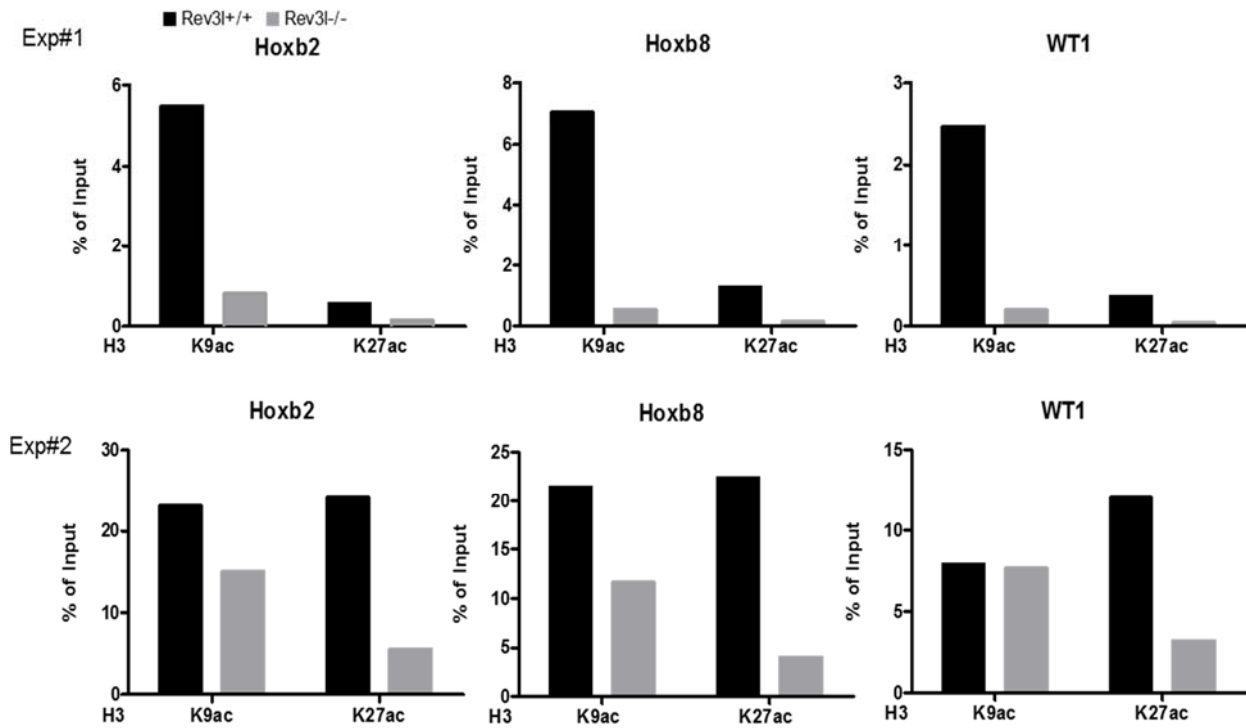

Appendix Figure S1: Enrichment of active histone mark, H3K9ac and H3K27ac at indicated loci was assessed by ChIP-qPCR in *Rev3<sup>+/+</sup>* and *Rev3<sup>-/-</sup>* MEFs. Results from 2 independent experiments are shown.
